# Supplementary material
Source: PubMed Central journal article supplement (PMC6192044)
Supplement: NIHMS963579-supplement.pdf [file NIHMS963579-supplement.pdf]

## Supplemental Information

# Ras and Rap signal bidirectional synaptic plasticity via distinct subcellular microdomains

Lei Zhang<sup>1,14</sup>, Peng Zhang<sup>1,14</sup>, Guangfu Wang<sup>1,5,14</sup>, Huaye Zhang<sup>3,4,6,14</sup>, Yajun Zhang<sup>1</sup>, Yilin Yu<sup>7</sup>, Mingxu Zhang<sup>8,9</sup>, Jian Xiao<sup>10</sup>, Piero Crespo<sup>11</sup>, Johannes W. Hell<sup>8,9</sup>, Li Lin<sup>10,15</sup>, Richard L. Huganir<sup>7</sup> and J. Julius Zhu<sup>1,2,10,12,13</sup>

Departments of <sup>1</sup>Pharmacology, <sup>2</sup>Neuroscience, <sup>3</sup>Microbiology and <sup>4</sup>Center for Cell Signaling, University of Virginia School of Medicine, Charlottesville, VA 22908

<sup>5</sup>Center for Life Sciences, School of Life Science and Technology, Harbin Institute of Technology, Harbin 150001, China

<sup>6</sup>Department of Neuroscience and Cell Biology, Rutgers Robert Wood Johnson Medical School, Piscataway, NJ 08854

<sup>7</sup>Department of Neuroscience, Howard Hughes Medical Institute, Johns Hopkins University School of Medicine, Baltimore, MD 21205

<sup>8</sup>Department of Pharmacology, University of Iowa, Iowa City, IA 52242

<sup>9</sup>Department of Pharmacology, University of California, Davis, CA 95616

<sup>10</sup>School of Pharmaceutical Sciences, Wenzhou Medical University, Wenzhou 325035, China

<sup>11</sup>Instituto de Biomedicina y Biotecnología de Cantabria and CIBERONC, Consejo Superior de Investigaciones Científicas (CSIC) – Universidad de Cantabria, Santander 39011, Spain

<sup>12</sup>School of Medicine, Ningbo University, Ningbo 315010, China

<sup>13</sup>Donders Institute for Brain, Cognition and Behavior, Radboud University Nijmegen, 6525 EN, Nijmegen, Netherlands

**Figure S1**

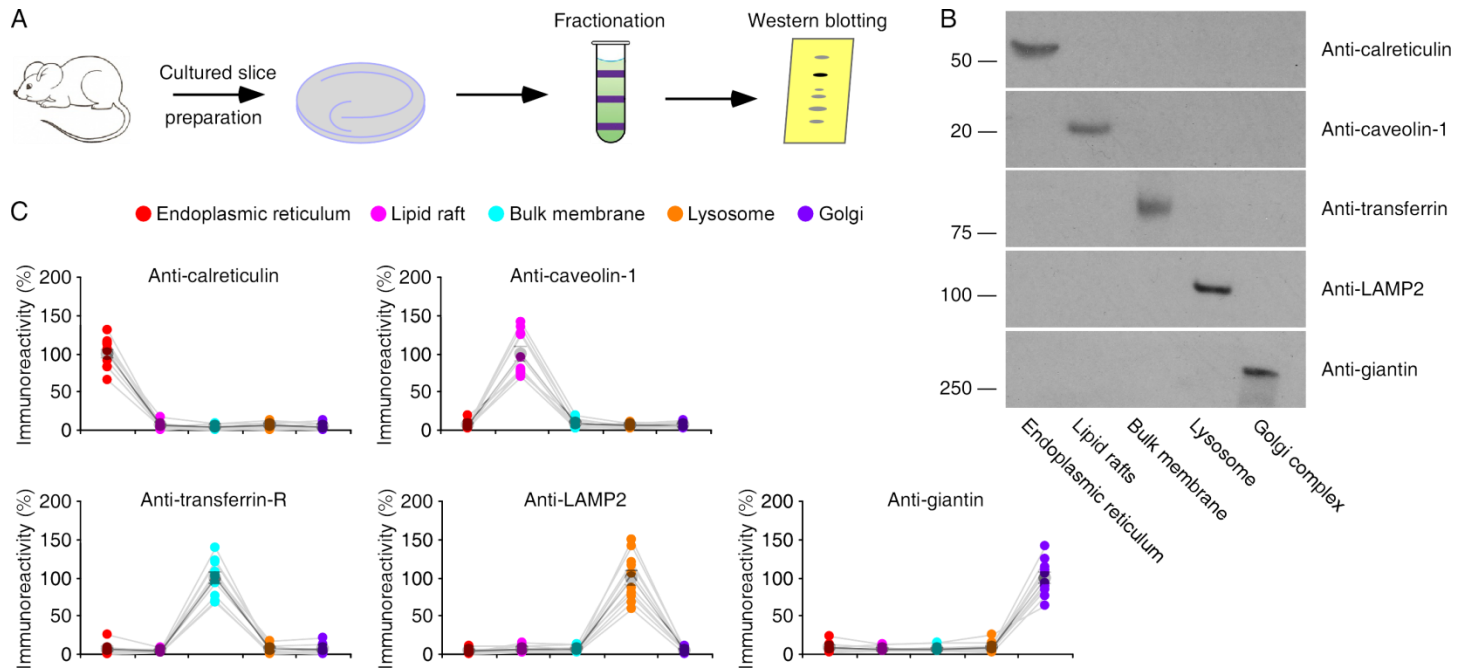

**Figure S1. Blotting of microdomain specific markers authenticates the micro-fractionation method, related to figure 1.**

**(A)** Schematic drawing outlines micro-fractionation experimental design.

**(B)** Blots of calreticulin, caveolin-1, transferrin receptor, LAMP2 and giantin in the endoplasmic reticulum, lipid rafts, bulk membrane, lysosome and Golgi complex fractionated from cultured rat hippocampal slices. Each lane was loaded with 5% of endoplasmic reticulum, lipid rafts, bulk membrane, lysosome or Golgi complex fractions isolated from 48 cultured hippocampal slices.

**(C)** Upper left, relative levels of calreticulin in all the other microdomains (Lipid rafts:  $5.3 \pm 1.3\%$ ; Bulk membrane:  $4.3 \pm 1.0\%$ ; Lysosome:  $6.3 \pm 1.3\%$ ; Golgi complex:  $4.8 \pm 1.3\%$ ) compared to that in the endoplasmic reticulum ( $100.0 \pm 6.1\%$ ;  $n=10$  from 144-240 slices prepared from 6-10 animals;  $Z=-2.803$ ;  $p<0.01$ ; Wilcoxon tests). Upper right, relative levels of caveolin-1 in all the other microdomains (Endoplasmic reticulum:  $6.5 \pm 1.5\%$ ; Bulk membrane:  $7.9 \pm 1.8\%$ ; Lysosome:  $6.3 \pm 0.8\%$ ; Golgi complex:  $6.5 \pm 1.2\%$ ) compared to that in the lipid rafts ( $100.0 \pm 8.9\%$ ;  $n=10$  from 144-240 slices prepared from 6-10 animals;  $Z=-2.803$ ;  $p<0.01$ ; Wilcoxon

tests). Lower left, relative levels of transferrin receptor in all the other microdomains (Endoplasmic reticulum:  $5.4 \pm 2.4\%$ ; Lipid rafts:  $3.9 \pm 0.8\%$ ; Lysosome:  $6.3 \pm 1.8\%$ ; Golgi complex:  $5.5 \pm 2.0\%$ ) compared to that in the bulk membrane ( $100.0 \pm 7.5\%$ ;  $n=10$  from 144-240 slices prepared from 6-10 animals;  $Z=-2.803$ ;  $p<0.01$ ; Wilcoxon tests). Lower middle, relative levels of LAMP2 in all the other microdomains (Endoplasmic reticulum:  $4.2 \pm 0.9\%$ ; Lipid rafts:  $6.0 \pm 1.4\%$ ; Bulk membrane:  $6.2 \pm 1.2\%$ ; Golgi complex:  $5.0 \pm 0.9\%$ ) compared to that in the lysosome ( $100.0 \pm 9.8\%$ ;  $n=10$  from 144-240 slices prepared from 6-10 animals;  $Z=-2.803$ ;  $p<0.01$ ; Wilcoxon tests). Lower left, relative levels of giantin in all the other microdomains (Endoplasmic reticulum:  $8.1 \pm 2.0\%$ ; Lipid rafts:  $6.7 \pm 1.1\%$ ; Bulk membrane:  $7.3 \pm 1.3\%$ ; Lysosome:  $8.8 \pm 2.1\%$ ) compared to that in the Golgi complex ( $100.0 \pm 7.4\%$ ;  $n=10$  from 144-240 slices prepared from 6-10 animals;  $Z=-2.803$ ;  $p<0.01$ ; Wilcoxon tests). The relative values and standard errors were normalized to average amounts of calreticulin, caveolin-1, transferrin receptor, LAMP2 and giantin in the endoplasmic reticulum, lipid rafts, bulk membrane, lysosome and Golgi complex fractionated from cultured rat hippocampal slices, respectively.

## Figure S2

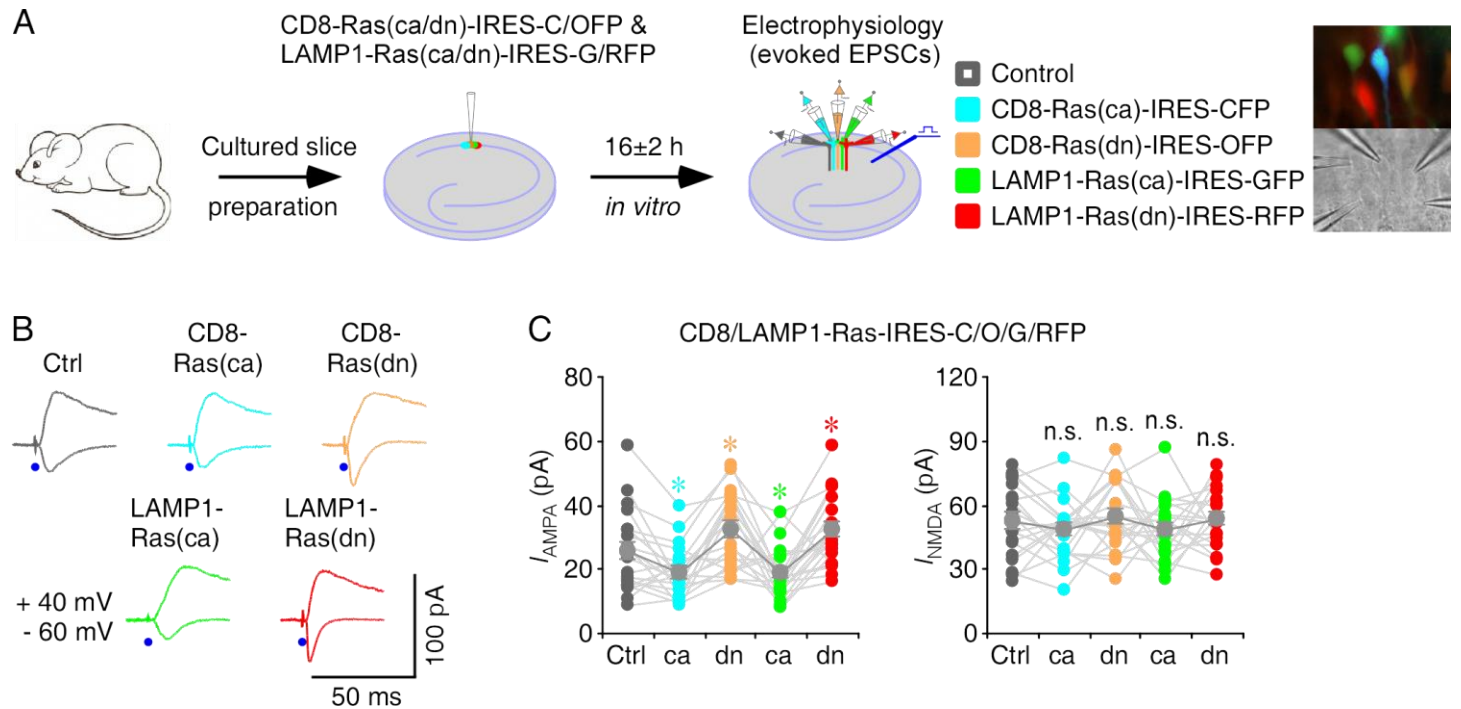

**Figure S2. Target-delivered Ras in the bulk membrane and lysosome depresses transmission, related to figure 2.**

**(A)** Schematic drawing outlines *in vitro* experimental design. The right images show simultaneous whole-cell recordings from LAMP1-Ras(dn)-IRES-RFP, LAMP1-Ras(ca)-IRES-GFP, CD8-Ras(ca)-IRES-CFP, CD8-Ras(dn)-IRES-OFP expressing and control non-expressing (in clockwise order) CA1 pyramidal neuron quintuplets under fluorescence (upper) and transmitted light (lower) microscopy.

**(B)** Evoked AMPA-R- (-60 mV) and NMDA-R- (+40 mV) mediated responses recorded from neighboring control non-expressing (Ctrl), CD8-Ras(ca)-IRES-CFP, CD8-Ras(dn)-IRES-OFP, LAMP1-Ras(ca)-IRES-GFP and LAMP1-Ras(dn)-IRES-RFP expressing CA1 cells after 16±2 h expression.

**(C)** AMPA and NMDA responses in CD8-Ras(ca), CD8-Ras(dn), LAMP1-Ras(ca) and LAMP1-Ras(dn) expressing neurons relative to neighboring non-expressing control cells. See **Table S5** for values of AMPA and NMDA responses. Asterisks indicate  $p < 0.05$  (Wilcoxon tests).

**Figure S3**

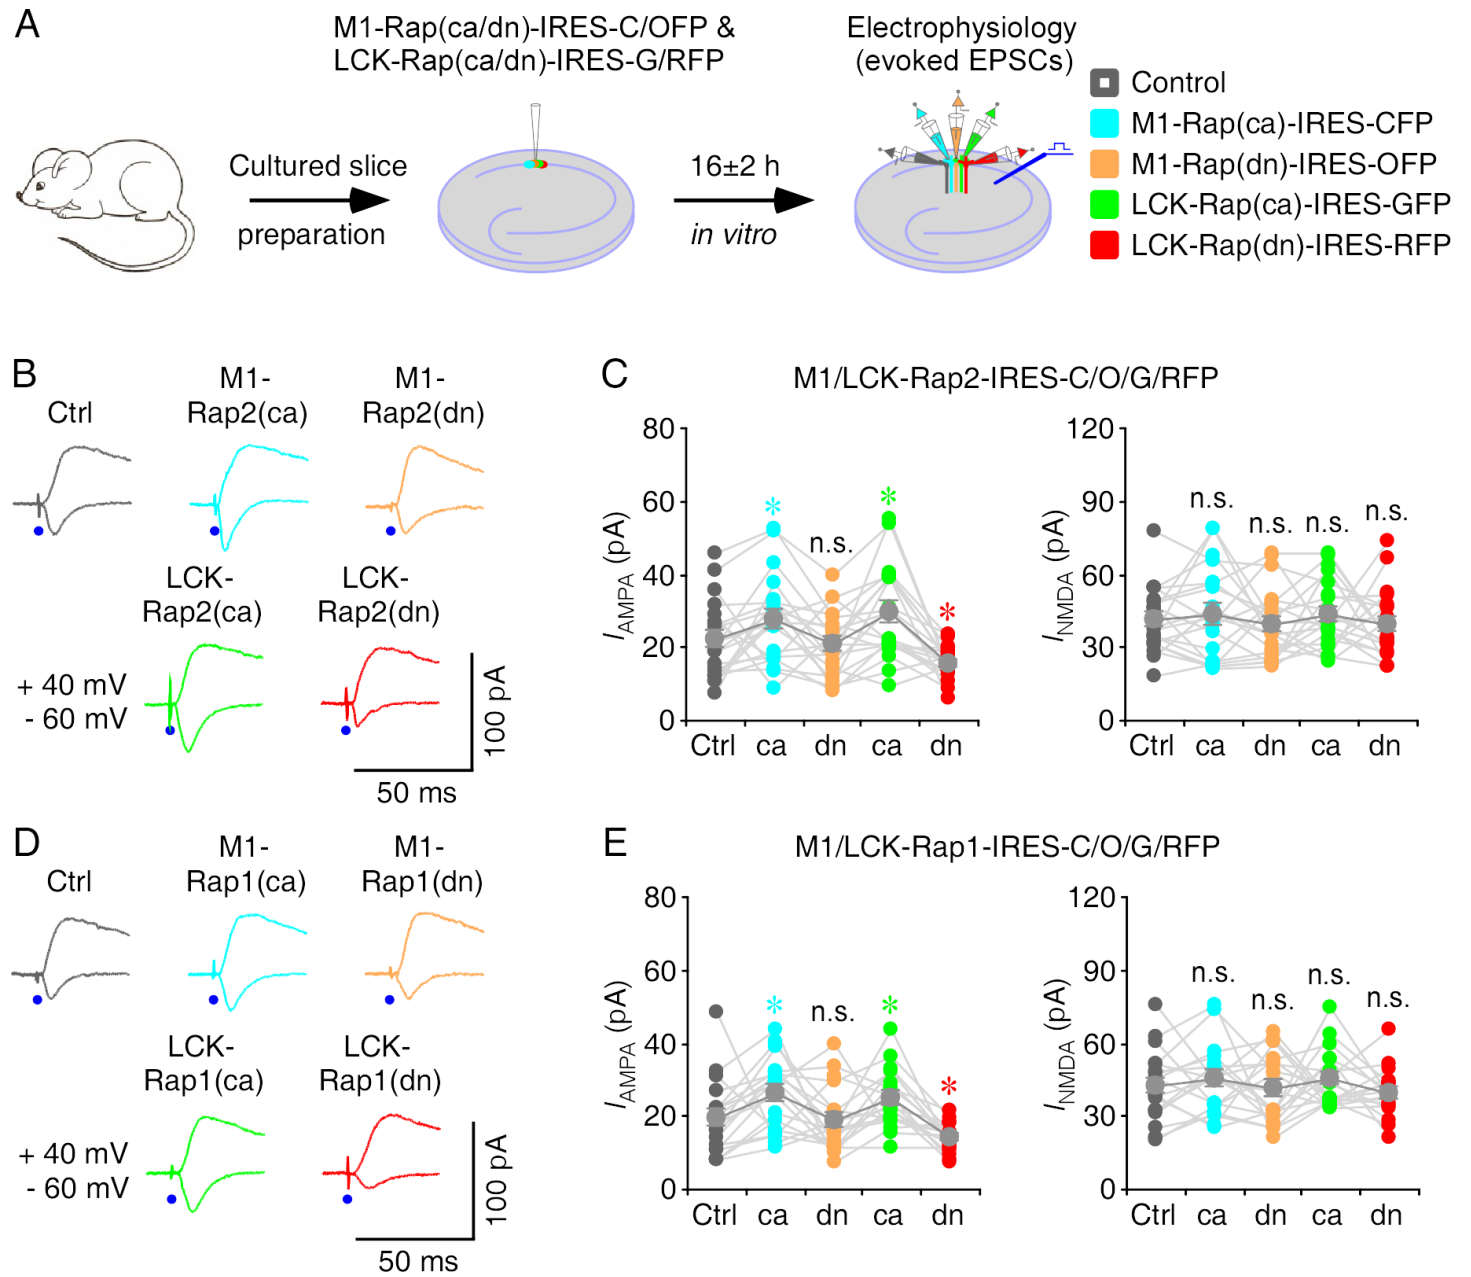

**Figure S3. Target-delivered Rap in the endoplasmic reticulum and lipid rafts potentiates transmission, related to figures 3-4.**

**(A)** Schematic drawing outlines *in vitro* experimental design.

**(B)** Evoked AMPA-R- (-60 mV) and NMDA-R- (+40 mV) mediated responses recorded from neighboring control non-expressing (Ctrl), M1-Rap2(ca)-IRES-CFP, M1-Rap2(dn)-IRES-OFP, LCK-Rap2(ca)-IRES-GFP and LCK-Rap2(dn)-IRES-RFP expressing CA1 cells after 16±2 h expression.

**(C)** AMPA and NMDA responses in M1-Rap2(ca), M1-Rap2(dn), LCK-Rap2(ca) and LCK-Rap2(dn) expressing neurons relative to neighboring non-expressing control cells. See **Table S5** for values of AMPA and NMDA responses. Asterisks indicate  $p < 0.05$  (Wilcoxon tests).

**(D)** Evoked AMPA-R- (-60 mV) and NMDA-R- (+40 mV) mediated responses recorded from neighboring control non-expressing (Ctrl), M1-Rap1(ca)-IRES-CFP, M1-Rap1(dn)-IRES-OFP, LCK-Rap1(ca)-IRES-GFP and LCK-Rap1(dn)-IRES-RFP expressing CA1 cells after 16±2 h expression.

**(E)** AMPA and NMDA responses in M1-Rap1(ca), M1-Rap1(dn), LCK-Rap1(ca) and LCK-Rap1(dn) expressing neurons relative to neighboring non-expressing control cells. See **Table S5** for values of AMPA and NMDA responses. Asterisks indicate  $p < 0.05$  (Wilcoxon tests).

**Figure S4**

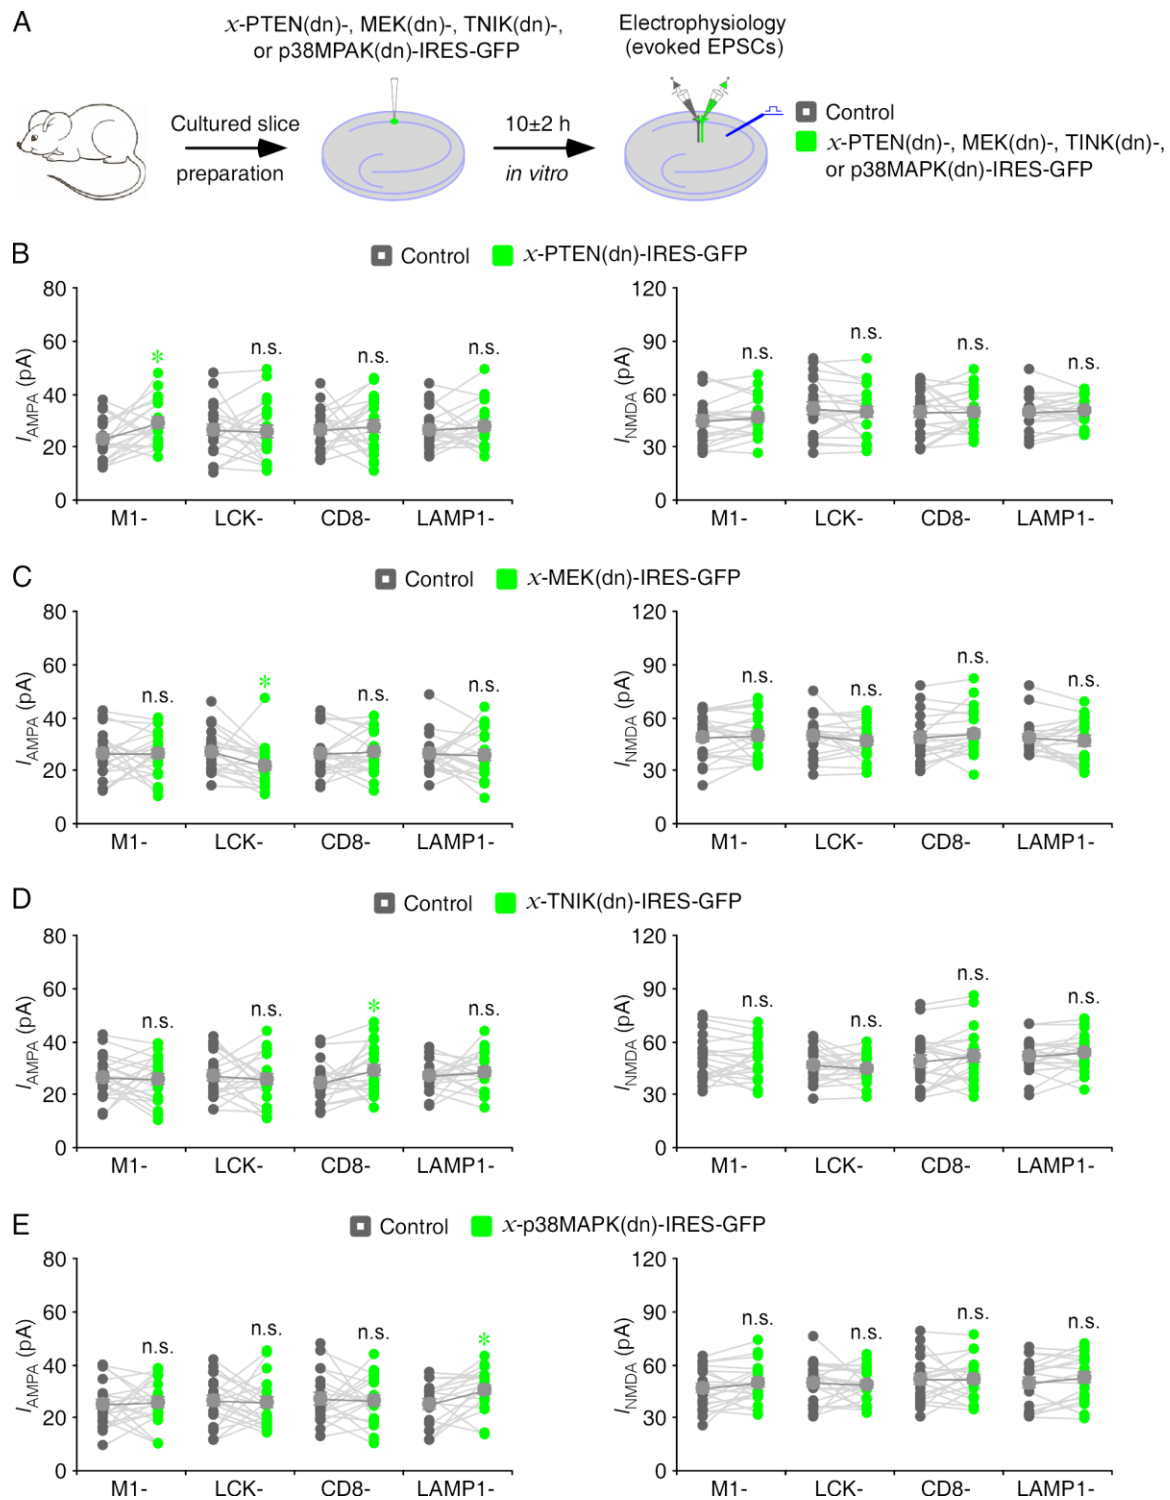

**Figure S4. Targeted expressions of PTEN, MEK, TNIK and p38MAPK alter transmission, related to figures 5-6.**

**(A)** Schematic drawing outlines *in vitro* experimental design.

**(B)** AMPA (left) and NMDA (right) responses in M1-PTEN(dn), LCK-PTEN(dn), CD8-PTEN(dn) and LAMP1-PTEN(dn) expressing neurons relative to neighboring non-expressing control cells. See **Table S8** for values of AMPA and NMDA responses.

**(C)** AMPA (left) and NMDA (right) responses in M1-MEK(dn), LCK-MEK(dn), CD8-MEK(dn) and LAMP1-MEK(dn) expressing neurons relative to neighboring non-expressing control cells. See **Table S8** for values of AMPA and NMDA responses.

**(D)** AMPA (left) and NMDA (right) responses in M1-TNIK(dn), LCK-TNIK(dn), CD8-TNIK(dn) and LAMP1-TNIK(dn) expressing neurons relative to neighboring non-expressing control cells. See **Table S8** for values of AMPA and NMDA responses.

**(E)** AMPA (left) and NMDA (right) responses in M1-p38MAPK(dn), LCK-p38MAPK(dn), CD8-p38MAPK(dn) and LAMP1-p38MAPK(dn) expressing neurons relative to neighboring non-expressing control cells. See **Table S8** for values of AMPA and NMDA responses. Asterisks indicate  $p < 0.05$  (Wilcoxon tests).



Figure S5

Anti-phospho-GluA1(S831)

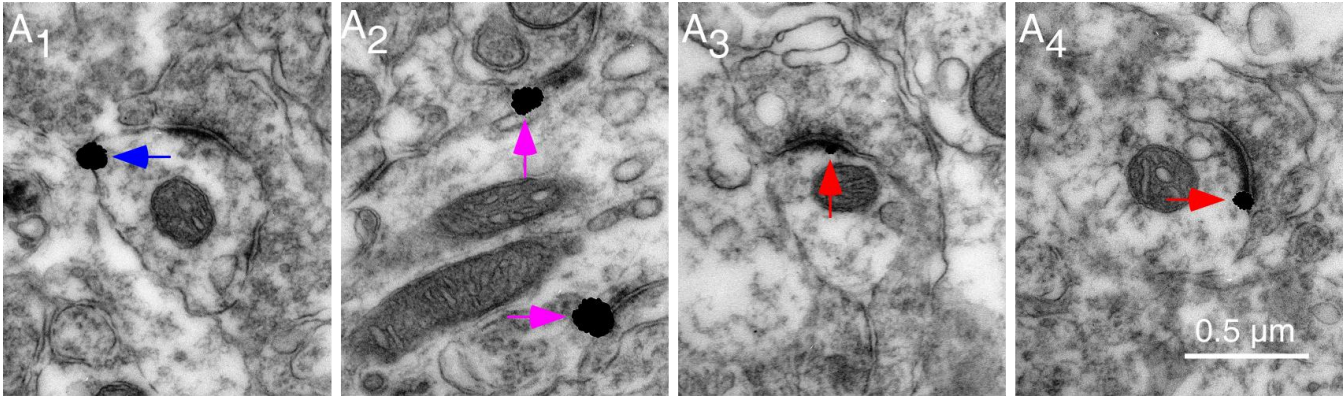

Anti-phospho-GluA1(S845)

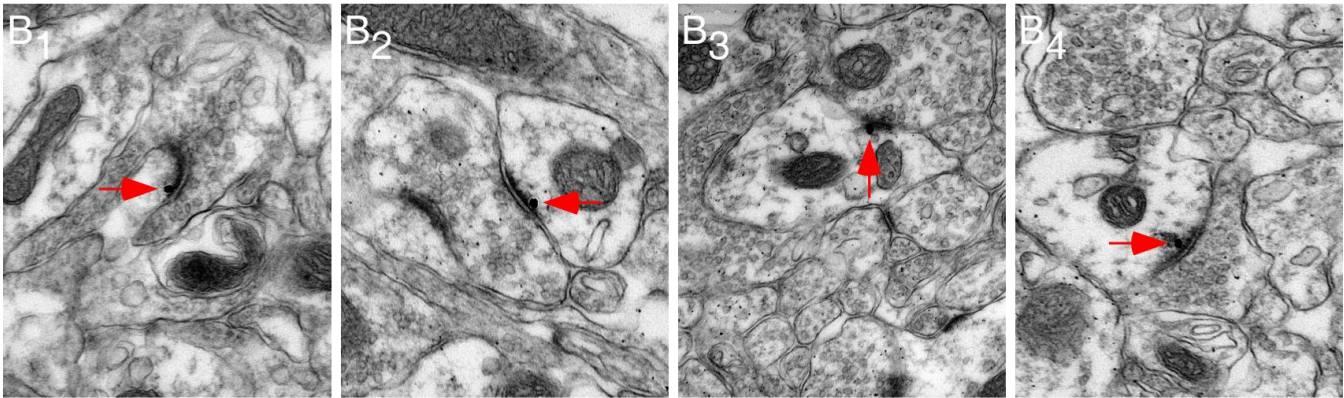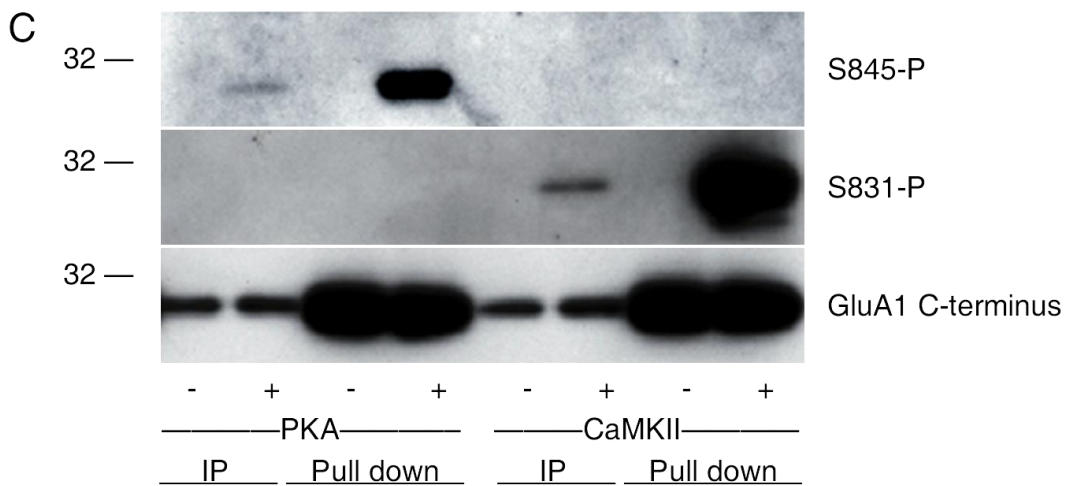

**Figure S5. Phosphorylation at S845 and S831 regulates GluA1 subcellular distribution at synapses, related to figure 7.**

**(A<sub>1-4</sub>)** Immunoelectron microscopic images show immunogold labeling of GluA1 with phosphorylation at S831 at mouse geniculate synapses (see (Kielland et al., 2009) for the methods). Note S831-phosphorylated GluA1 silver-gold particles located at the membrane within (red arrows), close to (pink arrows) and faraway from (blue arrow) the postsynaptic density (PSD).

**(B<sub>1-4</sub>)** Immunoelectron microscopic images show immunogold labeling of GluA1 with phosphorylation at S845 at mouse geniculate synapses. Note S845-phosphorylated GluA1 silver-gold particles located predominantly at the membrane within PSD (red arrows). Also note that authentication of anti-phospho-GluA1(S831) and anti-phospho-GluA1(S845) antibodies made by IP and pull down assays in **(C)**, and absence of S831- and S845-phosphorylated GluA1 silver-gold particles at synapses of *GluA1(S831A/S845A)* transgenic mice (not shown).

**(C)** GST fusion protein of GluA1 C-terminus (residues 833-907) was either immunoprecipitated with the anti-GluA1 C-terminus antibody (IP) or pulled down with glutathione Sepharose before incubation with PKA for S845 phosphorylation (lanes 2,4,6,8) or CaMKII for S831 phosphorylation (lanes 1,3,5,7). Samples were immunoblotted with anti-phospho-GluA1(S845), stripped and reprobed with anti-phospho-GluA1(S831), and ultimately with anti-GluA1 C-terminus. The anti-phospho-antibodies are highly specific for the respective phosphorylation sites.

**Table S1**

Relative protein expression levels in distinct microdomains of hippocampal cells (related to figure 1)

| Protein       | Endoplasmic reticulum | Lipid rafts | Bulk membrane | Lysosome    | Golgi complex | Sample No. Z & p values                        |
|---------------|-----------------------|-------------|---------------|-------------|---------------|------------------------------------------------|
| Ras           | 100.0±8.2%            | 117.1±10.1% | 113.3±10.3%   | 110.5±10.8% | 103.2±10.1%   | <i>n</i> =11; <i>Z</i> <1.800; <i>p</i> >0.05  |
| Rap2          | 100.0±6.8%            | 102.3±7.3%  | 110.3±8.3%    | 103.0±8.4%  | 106.7±9.3%    | <i>n</i> =11; <i>Z</i> <1.800; <i>p</i> >0.05  |
| Rap1          | 100.0±6.7%            | 94.1±5.1%   | 98.7±5.2%     | 89.7±4.4%   | 89.7±5.2%     | <i>n</i> =11; <i>Z</i> <1.800; <i>p</i> >0.05  |
| M1-Ras-YFP    | 100.0±7.7%            | 1.9±0.3%*   | 3.0±0.5%*     | 2.0±0.4%*   | 2.2±0.3%*     | <i>n</i> =10; <i>Z</i> =-2.803; <i>p</i> <0.01 |
| LCK-Ras-YFP   | 2.9±0.7%*             | 100.0±5.2%  | 7.3±1.7%*     | 2.7±0.4%*   | 2.6±0.4%*     | <i>n</i> =10; <i>Z</i> =-2.803; <i>p</i> <0.01 |
| CD8-Ras-YFP   | 2.7±0.5%*             | 18.3±2.3%*  | 100.0±7.3%    | 1.8±0.3%*   | 1.7±0.3%*     | <i>n</i> =10; <i>Z</i> =-2.803; <i>p</i> <0.01 |
| LAMP1-Ras-YFP | 6.2±0.9%*             | 8.0±0.9%*   | 18.3±2.3%*    | 100.0±5.1%  | 7.6±0.9%*     | <i>n</i> =10; <i>Z</i> =-2.803; <i>p</i> <0.01 |
| KDELr-Ras-YFP | 4.0±0.6%*             | 4.3±0.6%*   | 8.1±1.2%*     | 4.5±0.8%*   | 100.0±9.2%    | <i>n</i> =10; <i>Z</i> =-2.803; <i>p</i> <0.01 |
| Rap2          | 100.0±11.3%           | 99.4±10.0%  | 102.8±11.7%   | 99.8±10.4%  | 100.5±10.0%   | <i>n</i> =10; <i>Z</i> <0.800; <i>p</i> >0.15  |
| calreticulin  | 100.0±6.1%            | 5.3±1.3%*   | 4.3±1.0%*     | 6.3±1.3%*   | 4.8±1.3%*     | <i>n</i> =10; <i>Z</i> =-2.803; <i>p</i> <0.01 |
| caveolin-1    | 6.5±1.5%*             | 100.0±8.9%  | 7.9±1.8%*     | 6.3±0.8%*   | 6.5±1.2%*     | <i>n</i> =10; <i>Z</i> =-2.803; <i>p</i> <0.01 |
| transferrin-R | 5.4±2.4%*             | 3.9±0.8%*   | 100.0±7.5%    | 6.3±1.8%*   | 5.5±2.0%*     | <i>n</i> =10; <i>Z</i> =-2.803; <i>p</i> <0.01 |
| LAMP1-Ras-YFP | 4.2±0.9%*             | 6.0±1.4%*   | 6.2±1.2%*     | 100.0±9.8%  | 5.0±0.9%*     | <i>n</i> =10; <i>Z</i> =-2.803; <i>p</i> <0.01 |
| KDELr-Ras-YFP | 8.1±2.0%*             | 6.7±1.1%*   | 7.3±1.3%*     | 8.8±2.1%*   | 100.0±7.4%    | <i>n</i> =10; <i>Z</i> =-2.803; <i>p</i> <0.01 |

The relative values and standard errors were normalized to average amounts of the control groups and set to be 100%. In each row comparisons were made between any two groups if unmarked with asterisk, or between the unmarked control group and groups marked with asterisks. Note samples collected from 144-288 slices prepared from 6-12 animals.

**Table S2**

Synaptic effects of target-delivered Ras mutants in CA1 neurons (related to figure 2)

| Constructs    | AMPA currents<br>(Ctrl vs. Exp; pA) | Sample No.<br>Z & p values | NMDA currents<br>(Ctrl vs. Exp; pA) | Sample No.<br>Z & p values | Animal<br>No. |
|---------------|-------------------------------------|----------------------------|-------------------------------------|----------------------------|---------------|
| M1-Ras(ca)    | 26.6±2.4 vs. 35.5±3.3               | n=26; Z=2.212; p<0.05      | 51.1±4.6 vs. 52.4±4.4               | n=26; Z=0.192; p=0.77      | n=11          |
| M1-Ras(dd)    | 26.6±2.4 vs. 27.9±2.4               | n=26; Z=0.982; p=0.33      | 51.1±4.6 vs. 52.6±4.0               | n=26; Z=0.749; p=0.45      | n=11          |
| M1-Ras(dn)    | 26.6±2.4 vs. 26.0±2.0               | n=26; Z=-0.419; p=0.68     | 51.1±4.6 vs. 51.5±4.5               | n=26; Z=-0.051; p=0.96     | n=11          |
| LCK-Ras(ca)   | 23.1±2.6 vs. 34.3±3.4               | n=22; Z=2.841; p<0.01      | 39.3±4.3 vs. 40.8±4.1               | n=22; Z=0.243; p=0.81      | n=10          |
| LCK-Ras(dd)   | 23.1±2.6 vs. 23.7±3.7               | n=22; Z=0.016; p=0.99      | 39.3±4.3 vs. 38.8±4.1               | n=22; Z=-0.146; p=0.88     | n=10          |
| LCK-Ras(dn)   | 23.1±2.6 vs. 16.2±2.0               | n=22; Z=-2.468; p<0.05     | 39.3±4.3 vs. 38.5±4.8               | n=22; Z=-0.485; p=0.70     | n=10          |
| CD8-Ras(ca)   | 25.1±2.6 vs. 21.6±2.8               | n=20; Z=1.681; p=0.10      | 51.6±5.1 vs. 49.9±4.0               | n=20; Z=-0.709; p=0.48     | n=10          |
| CD8-Ras(dd)   | 25.1±2.6 vs. 24.5±2.8               | n=20; Z=0.112; p=0.91      | 51.6±5.1 vs. 51.2±4.9               | n=20; Z=0.104; p=0.88      | n=10          |
| CD8-Ras(dn)   | 25.1±2.6 vs. 28.7±2.9               | n=20; Z=1.605; p=0.11      | 51.6±5.1 vs. 53.1±5.2               | n=20; Z=0.411; p=0.68      | n=10          |
| LAMP1-Ras(ca) | 20.9±2.0 vs. 18.1±1.7               | n=22; Z=-1.380; p=0.17     | 45.6±4.6 vs. 46.9±3.6               | n=22; Z=0.568; p=0.57      | n=11          |
| LAMP1-Ras(dd) | 20.9±2.0 vs. 21.2±2.0               | n=22; Z=-0.306; p=0.76     | 45.6±4.6 vs. 47.3±3.7               | n=22; Z=0.276; p=0.78      | n=11          |
| LAMP1-Ras(dn) | 20.9±2.0 vs. 23.7±1.8               | n=22; Z=1.899; p=0.06      | 45.6±4.6 vs. 48.0±4.1               | n=22; Z=0.503; p=0.62      | n=11          |
| KDELR-Ras(ca) | 26.4±3.0 vs. 28.9±3.1               | n=20; Z=-1.369; p=0.17     | 43.2±2.7 vs. 43.0±4.0               | n=20; Z=-0.448; p=0.65     | n=10          |
| KDELR-Ras(dd) | 26.4±3.0 vs. 27.6±2.1               | n=20; Z=0.724; p=0.47      | 43.2±2.7 vs. 41.6±2.4               | n=20; Z=-0.635; p=0.53     | n=10          |
| KDELR-Ras(dn) | 26.4±3.0 vs. 26.6±2.7               | n=20; Z=0.261; p=0.79      | 43.2±2.7 vs. 44.2±3.0               | n=20; Z=0.523; p=0.60      | n=10          |

**Table S3**

Effects of target-delivered Rap2 mutants in CA1 neurons (related to figure 3)

| Constructs     | AMPA currents<br>(Ctrl vs. Exp; pA) | Sample No.<br>Z & p values | NMDA currents<br>(Ctrl vs. Exp; pA) | Sample No.<br>Z & p values | Animal<br>No. |
|----------------|-------------------------------------|----------------------------|-------------------------------------|----------------------------|---------------|
| M1-Rap2(ca)    | 22.5±2.5 vs. 25.8±1.9               | n=20; Z=1.307; p=0.19      | 48.3±4.9 vs. 47.6±5.1               | n=20; Z=-0.859; p=0.39     | n=9           |
| M1-Rap2(dd)    | 22.5±2.5 vs. 21.3±2.3               | n=20; Z=-0.653; p=0.51     | 48.3±4.9 vs. 46.7±4.2               | n=20; Z=-0.355; p=0.72     | n=9           |
| M1-Rap2(dn)    | 22.5±2.5 vs. 22.1±2.3               | n=20; Z=-0.261; p=0.79     | 48.3±4.9 vs. 46.3±4.6               | n=20; Z=-0.933; p=0.35     | n=9           |
| LCK-Rap2(ca)   | 21.4±2.2 vs. 23.8±1.9               | n=24; Z=1.572; p=0.12      | 41.9±3.5 vs. 42.6±2.5               | n=24; Z=0.400; p=0.69      | n=10          |
| LCK-Rap2(dd)   | 21.4±2.2 vs. 21.3±2.4               | n=24; Z=-0.429; p=0.67     | 41.9±3.5 vs. 41.6±3.0               | n=24; Z=-0.429; p=0.67     | n=10          |
| LCK-Rap2(dn)   | 21.4±2.2 vs. 18.1±1.7               | n=24; Z=-1.857; p=0.06     | 41.9±3.5 vs. 40.1±2.7               | n=24; Z=0.086; p=0.93      | n=10          |
| CD8-Rap2(ca)   | 23.6±2.2 vs. 16.9±1.6               | n=24; Z=-2.243; p<0.05     | 40.3±2.8 vs. 41.6±3.0               | n=24; Z=0.157; p=0.88      | n=11          |
| CD8-Rap2(dd)   | 23.6±2.2 vs. 22.5±2.6               | n=24; Z=2.329; p=0.74      | 40.3±2.8 vs. 39.5±3.4               | n=24; Z=-0.057; p=0.95     | n=11          |
| CD8-Rap2(dn)   | 23.6±2.2 vs. 29.8±3.0               | n=24; Z=2.171; p<0.05      | 40.3±2.8 vs. 41.9±2.8               | n=24; Z=0.296; p=0.78      | n=11          |
| LAMP1-Rap2(ca) | 24.5±2.3 vs. 21.2±1.5               | n=22; Z=1.347; p=0.18      | 50.7±3.7 vs. 52.4±2.9               | n=22; Z=0.417; p=0.68      | n=11          |
| LAMP1-Rap2(dd) | 24.5±2.3 vs. 25.3±2.0               | n=22; Z=-0.081; p=0.94     | 50.7±3.7 vs. 48.9±3.0               | n=22; Z=-0.373; p=0.71     | n=11          |
| LAMP1-Rap2(dn) | 24.5±2.3 vs. 27.8±1.9               | n=22; Z=1.623; p=0.11      | 50.7±3.7 vs. 51.0±2.9               | n=22; Z=0.114; p=0.91      | n=11          |
| KDELR-Rap2(ca) | 21.4±2.1 vs. 21.7±1.8               | n=22; Z=0.292; p=0.77      | 40.1±2.1 vs. 42.0±3.2               | n=22; Z=-0.146; p=0.88     | n=10          |
| KDELR-Rap2(dd) | 21.4±2.1 vs. 20.9±2.1               | n=22; Z=-0.365; p=0.72     | 40.1±2.1 vs. 40.8±2.9               | n=22; Z=-0.276; p=0.78     | n=10          |
| KDELR-Rap2(dn) | 21.4±2.1 vs. 20.7±2.3               | n=22; Z=-0.406; p=0.69     | 40.1±2.1 vs. 41.8±3.4               | n=22; Z=-0.406; p=0.69     | n=10          |

**Table S4**

Synaptic effects of target-delivered Rap1 mutants in CA1 neurons (related to figure 4)

| Constructs     | AMPA currents<br>(Ctrl vs. Exp; pA) | Sample No.<br>Z & p values | NMDA currents<br>(Ctrl vs. Exp; pA) | Sample No.<br>Z & p values | Animal<br>No. |
|----------------|-------------------------------------|----------------------------|-------------------------------------|----------------------------|---------------|
| M1-Rap1(ca)    | 21.1±2.1 vs. 24.8±2.3               | n=22; Z=1.607; p=0.11      | 48.2±2.3 vs. 49.0±2.3               | n=22; Z=0.503; p=0.62      | n=11          |
| M1-Rap1(dd)    | 21.1±2.1 vs. 20.4±2.0               | n=22; Z=-0.601; p=0.55     | 48.2±2.3 vs. 49.3±4.3               | n=22; Z=0.243; p=0.81      | n=11          |
| M1-Rap1(dn)    | 21.1±2.1 vs. 20.6±1.5               | n=22; Z=-0.179; p=0.86     | 48.2±2.3 vs. 49.7±3.5               | n=22; Z=0.471; p=0.64      | n=11          |
| LCK-Rap1(ca)   | 23.4±2.2 vs. 25.5±1.7               | n=20; Z=1.419; p=0.16      | 44.8±2.1 vs. 42.9±2.8               | n=20; Z=-0.784; p=0.43     | n=10          |
| LCK-Rap1(dd)   | 23.4±2.2 vs. 22.9±2.2               | n=20; Z=0.411; p=0.68      | 44.8±2.1 vs. 47.2±4.3               | n=20; Z=0.635; p=0.53      | n=10          |
| LCK-Rap1(dn)   | 23.4±2.2 vs. 22.3±2.4               | n=20; Z=-1.827; p=0.07     | 44.8±2.1 vs. 45.7±4.5               | n=20; Z=0.075; p=0.94      | n=10          |
| CD8-Rap1(ca)   | 19.8±2.2 vs. 17.6±1.7               | n=20; Z=-1.690; p=0.09     | 42.0±4.1 vs. 41.5±2.8               | n=20; Z=0.075; p=0.94      | n=9           |
| CD8-Rap1(dd)   | 19.8±2.2 vs. 20.3±1.5               | n=20; Z=0.411; p=0.68      | 42.0±4.1 vs. 43.7±2.8               | n=20; Z=0.336; p=0.74      | n=9           |
| CD8-Rap1(dn)   | 19.8±2.2 vs. 21.6±1.9               | n=20; Z=1.419; p=0.16      | 42.0±4.1 vs. 41.7±3.7               | n=20; Z=-0.161; p=0.87     | n=9           |
| LAMP1-Rap1(ca) | 26.7±2.3 vs. 19.2±1.6               | n=22; Z=-2.368; p<0.05     | 50.5±3.6 vs. 51.5±2.8               | n=22; Z=0.341; p=0.73      | n=10          |
| LAMP1-Rap1(dd) | 26.7±2.3 vs. 26.6±1.7               | n=22; Z=0.343; p=0.81      | 50.5±3.6 vs. 51.8±3.3               | n=22; Z=0.146; p=0.88      | n=10          |
| LAMP1-Rap1(dn) | 26.7±2.3 vs. 35.4±2.2               | n=22; Z=2.873; p<0.005     | 50.5±3.6 vs. 52.2±3.2               | n=22; Z=0.341; p=0.77      | n=10          |
| KDELR-Rap1(ca) | 27.8±2.7 vs. 27.5±3.7               | n=20; Z=-0.327; p=0.74     | 45.5±4.0 vs. 44.1±4.8               | n=20; Z=-0.597; p=0.55     | n=10          |
| KDELR-Rap1(dd) | 27.8±2.7 vs. 27.2±3.1               | n=20; Z=0.075; p=0.94      | 45.5±4.0 vs. 44.7±4.3               | n=20; Z=0.075; p=0.94      | n=10          |
| KDELR-Rap1(dn) | 27.8±2.7 vs. 27.0±3.4               | n=20; Z=-0.187; p=0.85     | 45.5±4.0 vs. 43.5±5.5               | n=20; Z=-0.261; p=0.79     | n=10          |

**Table S5**

Effects of Ras and Rap after prolonged expression in undesired microdomains (related to figures 2-4)

| Constructs    | AMPA currents<br>(Ctrl vs. Exp; pA) | Sample No.<br>Z & p values | NMDA currents<br>(Ctrl vs. Exp; pA) | Sample No.<br>Z & p values | Animal<br>No. |
|---------------|-------------------------------------|----------------------------|-------------------------------------|----------------------------|---------------|
| CD8-Ras(ca)   | 25.7±2.8 vs. 19.0±1.8               | n=20; Z=-2.613; p<0.01     | 52.5±3.8 vs. 48.0±3.1               | n=20; Z=-1.344; p=0.18     | n=10          |
| CD8-Ras(dn)   | 25.7±2.8 vs. 32.3±2.7               | n=20; Z=2.613; p<0.01      | 52.5±3.8 vs. 54.1±3.6               | n=20; Z=0.448; p=0.65      | n=10          |
| LAMP1-Ras(ca) | 25.7±2.8 vs. 19.1±1.9               | n=20; Z=-1.979; p<0.05     | 52.5±3.8 vs. 48.3±3.3               | n=20; Z=-1.045; p=0.30     | n=10          |
| LAMP1-Ras(dn) | 25.7±2.8 vs. 32.0±2.5               | n=20; Z=2.315; p<0.05      | 52.5±3.8 vs. 53.5±3.2               | n=20; Z=0.187; p=0.85      | n=10          |
| M1-Rap2(ca)   | 19.3±2.5 vs. 26.2±2.3               | n=18; Z=2.737; p<0.05      | 42.4±3.5 vs. 45.0±3.4               | n=18; Z=1.002; p=0.32      | n=9           |
| M-Rap2(dn)    | 19.3±2.5 vs. 18.7±2.1               | n=18; Z=0.414; p=0.68      | 42.4±3.5 vs. 41.0±3.3               | n=18; Z=-0.260; p=0.80     | n=9           |
| LCK-Rap2(ca)  | 19.3±2.5 vs. 24.8±1.9               | n=18; Z=2.025; p<0.05      | 42.4±3.5 vs. 45.0±2.8               | n=18; Z=0.852; p=0.39      | n=9           |
| LCK-Rap2(dn)  | 19.3±2.5 vs. 13.9±0.9               | n=18; Z=-2.504; p<0.05     | 42.4±3.5 vs. 39.5±2.4               | n=18; Z=-0.806; p=0.42     | n=9           |
| M1-Rap1(ca)   | 21.9±2.4 vs. 27.9±2.7               | n=20; Z=2.240; p<0.05      | 41.2±3.0 vs. 43.6±4.3               | n=20; Z=0.095; p=0.94      | n=10          |
| M-Rap1(dn)    | 21.9±2.4 vs. 20.9±2.0               | n=20; Z=0.261; p=0.79      | 41.2±3.0 vs. 39.5±3.2               | n=20; Z=-0.672; p=0.50     | n=10          |
| LCK-Rap1(ca)  | 21.9±2.4 vs. 29.2±2.8               | n=20; Z=2.901; p<0.05      | 41.2±3.0 vs. 43.7±3.2               | n=20; Z=0.691; p=0.49      | n=10          |
| LCK-Rap1(dn)  | 21.9±2.4 vs. 15.7±1.0               | n=20; Z=-2.446; p<0.05     | 41.2±3.0 vs. 39.3±3.2               | n=20; Z=-1.176; p=0.24     | n=10          |

**Table S6**

Effects of target-delivered Ras and Rap mutants in the presence of inhibitors (related to figures 5-6)

| Constructs/<br>inhibitors | AMPA currents<br>(Ctrl vs. Exp; pA) | Sample No.<br>Z & p values | NMDA currents<br>(Ctrl vs. Exp; pA) | Sample No.<br>Z & p values | Animal<br>No. |
|---------------------------|-------------------------------------|----------------------------|-------------------------------------|----------------------------|---------------|
| <b>LY294002</b>           |                                     |                            |                                     |                            |               |
| M1-Ras(ca)                | 19.2±1.7 vs. 19.8±1.9               | n=24; Z=-0.129; p=0.90     | 46.0±3.7 vs. 47.2±4.4               | n=24; Z=0.114; p=0.91      | n=8           |
| LCK-Ras(ca)               | 19.2±1.7 vs. 26.5±2.4               | n=24; Z=-2.829; p<0.001    | 46.0±3.7 vs. 47.6±3.7               | n=24; Z=0.557; p=0.58      | n=8           |
| M1-Ras(dn)                | 28.9±1.9 vs. 27.5±2.4               | n=22; Z=-1.023; p=0.31     | 51.3±3.1 vs. 52.5±3.6               | n=22; Z=-0.276; p=0.78     | n=10          |
| LCK-Ras(dn)               | 28.9±1.9 vs. 21.4±1.6               | n=22; Z=-3.231; p<0.01     | 51.3±3.1 vs. 48.0±2.8               | n=22; Z=-1.477; p=0.14     | n=10          |
| <b>PD98059</b>            |                                     |                            |                                     |                            |               |
| M1-Ras(ca)                | 23.7±1.6 vs. 23.1±2.0               | n=24; Z=-0.271; p=0.79     | 53.4±3.3 vs. 51.6±2.5               | n=24; Z=-0.343; p=0.73     | n=7           |
| LCK-Ras(ca)               | 23.7±1.6 vs. 25.1±1.9               | n=24; Z=-0.271; p=0.79     | 53.4±3.3 vs. 53.9±2.5               | n=24; Z=0.186; p=0.85      | n=7           |
| M1-Ras(dn)                | 27.4±2.3 vs. 28.9±2.7               | n=21; Z=0.191; p=0.85      | 53.4±3.2 vs. 55.3±3.2               | n=21; Z=0.382; p=0.70      | n=9           |
| LCK-Ras(dn)               | 27.4±2.3 vs. 27.9±2.4               | n=21; Z=0.037; p=0.97      | 53.4±3.2 vs. 55.0±2.9               | n=21; Z=0.087; p=0.93      | n=9           |
| <b>SP600125</b>           |                                     |                            |                                     |                            |               |
| CD8-Rap2(ca)              | 27.2±1.9 vs. 26.7±2.0               | n=25; Z=-0.143; p=0.89     | 50.8±2.9 vs. 51.7±2.6               | n=25; Z=0.457; p=0.65      | n=13          |
| LAMP1-Rap1(ca)            | 27.2±1.9 vs. 20.2±1.1               | n=25; Z=-3.646; p<0.005    | 50.8±2.9 vs. 48.1±2.7               | n=25; Z=-1.009; p=0.31     | n=13          |
| CD8-Rap2(dn)              | 23.3±1.9 vs. 25.2±1.9               | n=20; Z=0.821; p=0.41      | 45.8±3.0 vs. 46.4±3.0               | n=20; Z=0.747; p=0.46      | n=9           |
| LAMP1-Rap1(dn)            | 23.3±1.9 vs. 25.6±1.6               | n=20; Z=2.464; p<0.05      | 45.8±3.0 vs. 48.9±2.8               | n=20; Z=0.784; p=0.43      | n=9           |
| <b>SB203580</b>           |                                     |                            |                                     |                            |               |
| CD8-Rap2(ca)              | 29.5±2.3 vs. 21.8±1.9               | n=24; Z=-4.215; p<0.005    | 52.7±2.9 vs. 50.6±2.8               | n=24; Z=1.472; p=0.14      | n=12          |
| LAMP1-Rap1(ca)            | 29.5±2.3 vs. 29.2±2.2               | n=24; Z=-0.029; p=0.98     | 52.7±2.9 vs. 52.6±2.7               | n=24; Z=0.571; p=0.57      | n=12          |
| CD8-Rap2(dn)              | 24.8±1.8 vs. 30.9±2.6               | n=21; Z=2.227; p<0.05      | 45.9±3.0 vs. 50.0±3.0               | n=21; Z=1.703; p=0.09      | n=10          |



---

LAMP1-Rap1(dn) 24.8±1.8 vs. 23.5±1.9  $n=21$ ;  $Z=-0.539$ ;  $p=0.59$  45.9±3.0 vs. 45.8±3.2  $n=21$ ;  $Z=-0.295$ ;  $p=0.77$   $n=10$

---

**Table S7**

Effects of target-delivered Ras mutants in knockout and transgenic mice (related to figure 5)

| Constructs/<br>mouse lines | AMPA currents<br>(Ctrl vs. Exp; pA) | Sample No.<br>Z & p values | NMDA currents<br>(Ctrl vs. Exp; pA) | Sample No.<br>Z & p values | Animal<br>No. |
|----------------------------|-------------------------------------|----------------------------|-------------------------------------|----------------------------|---------------|
| <i>GluA1</i> KO            |                                     |                            |                                     |                            |               |
| M1-Ras(ca)                 | 21.9±2.6 vs. 21.2±1.6               | n=24; Z=0.200; p=0.84      | 46.3±2.5 vs. 47.1±2.2               | n=24; Z=0.429; p=0.67      | n=7           |
| LCK-Ras(ca)                | 21.9±2.6 vs. 33.3±2.5               | n=24; Z=3.143; p<0.005     | 46.3±2.5 vs. 48.4±2.4               | n=24; Z=0.914; p=0.36      | n=7           |
| M1-Ras(dn)                 | 28.5±2.2 vs. 30.1±2.6               | n=22; Z=-1.023; p=0.31     | 52.9±2.9 vs. 52.3±3.6               | n=22; Z=0.539; p=0.59      | n=10          |
| LCK-Ras(dn)                | 28.5±2.2 vs. 20.7±1.5               | n=22; Z=-3.231; p<0.005    | 52.9±2.9 vs. 48.8±3.2               | n=22; Z=-1.360; p=0.17     | n=10          |
| <i>GluA1(S831A/S831A)</i>  |                                     |                            |                                     |                            |               |
| M1-Ras(ca)                 | 26.1±2.4 vs. 27.1±2.2               | n=24; Z=0.568; p=0.57      | 47.1±3.3 vs. 48.9±2.3               | n=24; Z=0.925; p=0.36      | n=5           |
| LCK-Ras(ca)                | 26.1±2.4 vs. 33.7±2.1               | n=24; Z=3.393; p<0.005     | 47.1±3.3 vs. 49.3±2.5               | n=24; Z=0.552; p=0.58      | n=5           |
| <i>GluA2</i> KO            |                                     |                            |                                     |                            |               |
| M1-Ras(ca)                 | 21.0±1.6 vs. 29.1±2.4               | n=24; Z=-0.271; p=0.79     | 46.9±3.0 vs. 48.1±3.2               | n=24; Z=3.057; p<0.005     | n=6           |
| LCK-Ras(ca)                | 21.0±1.6 vs. 21.5±1.5               | n=24; Z=0.143; p=0.89      | 46.9±3.0 vs. 48.7±2.6               | n=24; Z=0.800; p=0.42      | n=6           |
| M1-Ras(dn)                 | 25.5±2.6 vs. 25.1±1.8               | n=22; Z=-0.341; p=0.73     | 45.5±3.7 vs. 46.9±2.9               | n=22; Z=0.114; p=0.98      | n=9           |
| LCK-Ras(dn)                | 25.5±2.6 vs. 26.1±2.5               | n=22; Z=-0.016; p=0.99     | 45.5±3.7 vs. 46.6±3.4               | n=22; Z=0.211; p=0.83      | n=9           |

**Table S8**

Effects of target-delivered PTEN, MEK, TNIK and p38MAPK (related to figures 5-6)

| Constructs/<br>Inhibitors | AMPA currents<br>(Ctrl vs. Exp; pA) | Sample No.<br>Z & p values | NMDA currents<br>(Ctrl vs. Exp; pA) | Sample No.<br>Z & p values | Animal<br>No. |
|---------------------------|-------------------------------------|----------------------------|-------------------------------------|----------------------------|---------------|
| <b>X-PTEN(dn)</b>         |                                     |                            |                                     |                            |               |
| M1-PTEN(dn)               | 22.6±1.7 vs. 29.0±1.9               | n=20; Z=2.352; p<0.05      | 44.8±2.9 vs. 46.8±2.5               | n=20; Z=1.232; p=0.22      | n=8           |
| LCK-PTEN(dn)              | 26.1±2.2 vs. 25.7±2.4               | n=21; Z=0.156; p=0.88      | 51.8±3.5 vs. 49.2±3.1               | n=21; Z=0.852; p=0.39      | n=9           |
| CD8-PTEN(dn)              | 26.5±1.7 vs. 27.9±2.3               | n=21; Z=0.608; p=0.54      | 49.4±2.9 vs. 49.3±2.5               | n=21; Z=0.643; p=0.52      | n=8           |
| LAMP1-PTEN(dn)            | 26.4±1.5 vs. 27.3±1.8               | n=22; Z=0.552; p=0.58      | 49.4±2.1 vs. 49.9±1.7               | n=22; Z=0.942; p=0.35      | n=10          |
| <b>X-MEK(dn)</b>          |                                     |                            |                                     |                            |               |
| M1-MEK(dn)                | 26.3±1.8 vs. 26.0±1.9               | n=21; Z=0.017; p=0.99      | 48.8±2.8 vs. 49.2±2.6               | n=21; Z=0.434; p=0.66      | n=10          |
| LCK-MEK(dn)               | 27.0±1.8 vs. 21.8±1.8               | n=20; Z=-2.613; p<0.01     | 49.6±2.6 vs. 46.6±2.3               | n=20; Z=-0.821; p=0.41     | n=7           |
| CD8-MEK(dn)               | 26.0±1.9 vs. 26.6±1.9               | n=20; Z=0.073; p=0.97      | 48.2±2.8 vs. 50.8±2.9               | n=20; Z=1.269; p=0.24      | n=9           |
| LAMP1-MEK(dn)             | 26.1±1.6 vs. 25.7±2.1               | n=20; Z=-0.149; p=0.88     | 48.1±2.2 vs. 46.3±2.9               | n=20; Z=-0.691; p=0.49     | n=8           |
| <b>X-TNIK(dn)</b>         |                                     |                            |                                     |                            |               |
| M1-TNIK(dn)               | 26.4±1.7 vs. 25.5±1.9               | n=21; Z=0.643; p=0.52      | 49.7±2.8 vs. 49.7±2.4               | n=21; Z=-0.365; p=0.72     | n=9           |
| LCK-TNIK(dn)              | 26.8±1.9 vs. 25.3±2.0               | n=20; Z=-0.597; p=0.55     | 46.3±2.2 vs. 44.1±1.8               | n=20; Z=-0.299; p=0.77     | n=8           |
| CD8-TNIK(dn)              | 24.2±1.8 vs. 28.9±2.1               | n=20; Z=2.184; p<0.05      | 48.7±3.4 vs. 51.3±3.4               | n=20; Z=1.083; p=0.28      | n=7           |
| LAMP1-TNIK(dn)            | 27.8±1.3 vs. 28.4±1.7               | n=20; Z=0.448; p=0.65      | 51.1±2.3 vs. 53.3±2.3               | n=20; Z=1.120; p=0.26      | n=8           |
| <b>X-p38(dn)</b>          |                                     |                            |                                     |                            |               |
| M1-p38(dn)                | 24.6±1.8 vs. 25.5±1.9               | n=21; Z=0.297; p=0.77      | 45.9±2.5 vs. 49.3±2.4               | n=21; Z=1.442; p=0.15      | n=10          |
| LCK-p38(dn)               | 26.2±1.9 vs. 25.4±2.0               | n=21; Z=-0.365; p=0.72     | 49.7±2.5 vs. 48.3±2.1               | n=21; Z=-0.365; p=0.72     | n=10          |
| CD8-p38(dn)               | 27.2±2.2 vs. 26.4±2.1               | n=19; Z=-0.121; p=0.90     | 51.2±3.0 vs. 51.8±2.8               | n=19; Z=0.463; p=0.64      | n=8           |
| LAMP1-p38(dn)             | 24.8±1.9 vs. 30.5±1.9               | n=18; Z=2.243; p<0.05      | 49.2±3.3 vs. 52.4±3.2               | n=18; Z=1.720; p=0.09      | n=7           |

**Table S9**

Effects of target-delivered Rap mutants in knockout and transgenic mice (related to figure 6)

| Constructs/<br>mouse lines | AMPA currents<br>(Ctrl vs. Exp; pA) | Sample No.<br>Z & p values | NMDA currents<br>(Ctrl vs. Exp; pA) | Sample No.<br>Z & p values | Animal<br>No. |
|----------------------------|-------------------------------------|----------------------------|-------------------------------------|----------------------------|---------------|
| <i>GluA1</i> KO            |                                     |                            |                                     |                            |               |
| CD8-Rap2(ca)               | 32.3±2.4 vs. 23.4±1.8               | n=22; Z=-3.912; p<0.005    | 54.7±4.3 vs. 52.1±3.9               | n=22; Z=-1.443; p=0.12     | n=10          |
| LAMP1-Rap1(ca)             | 32.3±2.4 vs. 24.1±1.9               | n=22; Z=-3.717; p<0.005    | 54.7±4.3 vs. 51.3±3.7               | n=22; Z=-1.510; p=0.13     | n=10          |
| CD8-Rap2(dn)               | 24.2±1.3 vs. 28.7±2.0               | n=23; Z=2.433; p<0.05      | 46.2±2.4 vs. 48.7±2.3               | n=23; Z=0.386; p=0.87      | n=9           |
| LAMP1-Rap1(dn)             | 24.2±1.3 vs. 29.5±2.1               | n=23; Z=2.281; p<0.05      | 46.2±2.4 vs. 48.4±2.4               | n=23; Z=0.354; p=0.93      | n=9           |
| <i>GluA2</i> KO            |                                     |                            |                                     |                            |               |
| CD8-Rap2(ca)               | 25.0±2.3 vs. 25.5±2.0               | n=24; Z=0.629; p=0.53      | 46.4±2.6 vs. 44.7±2.3               | n=24; Z=-0.343; p=0.73     | n=12          |
| LAMP1-Rap1(ca)             | 25.0±2.3 vs. 24.5±2.1               | n=24; Z=-0.086; p=0.93     | 46.4±2.6 vs. 45.1±2.5               | n=24; Z=-0.200; p=0.84     | n=12          |
| CD8-Rap2(dn)               | 25.5±1.4 vs. 26.9±2.1               | n=20; Z=0.261; p=0.79      | 48.9±3.0 vs. 50.6±3.0               | n=20; Z=0.261; p=0.79      | n=8           |
| LAMP1-Rap1(dn)             | 25.5±1.4 vs. 26.2±1.8               | n=20; Z=0.131; p=0.90      | 48.9±3.0 vs. 49.6±2.7               | n=20; Z=0.168; p=0.87      | n=8           |
| <i>GluA2(K882A)</i>        |                                     |                            |                                     |                            |               |
| CD8-Rap2(ca)               | 29.4±1.4 vs. 22.1±1.7               | n=22; Z=-3.880; p<0.005    | 55.8±2.9 vs. 52.5±3.1               | n=22; Z=-1.380; p=0.17     | n=6           |
| LAMP1-Rap1(ca)             | 29.4±1.4 vs. 27.8±1.6               | n=22; Z=-1.591; p=0.11     | 55.8±2.9 vs. 55.2±3.4               | n=22; Z=-0.224; p=0.81     | n=6           |

**Table S10**

Effects of target-delivered Ras(dn) and Rap(dn) on synaptic plasticity (related to figure 7)

| Constructs        | Exp Pathway<br>(Ctrl vs. Exp; %) | Sample No.<br>Z & p values | Control Pathway<br>(Ctrl vs. Exp; %) | Sample No.<br>Z & p values | Animal<br>No. |
|-------------------|----------------------------------|----------------------------|--------------------------------------|----------------------------|---------------|
| LTP               |                                  |                            |                                      |                            |               |
| M1-Ras(dn)        | 195.0±12.0 vs. 146.4±11.3        | n=14; Z=-3.296; p<0.005    | 89.9±8.7 vs. 91.1±3.7                | n=14; Z=-0.157; p=0.88     | n=14          |
| LCK-Ras(dn)       | 198.7±12.3 vs. 100.9±6.0         | n=14; Z=-3.296; p<0.005    | 94.4±7.9 vs. 94.3±4.1                | n=14; Z=0.596; p=0.55      | n=14          |
| CD8-Rap2(dn)      | 195.7±7.9 vs. 212.0±10.0         | n=14; Z=-1.287; p=0.10     | 93.2±7.0 vs. 99.9±4.9                | n=14; Z=0.943; p=0.35      | n=14          |
| LAMP1-Rap1(dn)    | 198.4±6.6 vs. 199.3±6.6          | n=14; Z=0.220; p=0.83      | 91.7±6.9 vs. 102.4±4.7               | n=14; Z=1.726; p=0.08      | n=14          |
| Depotentialiation |                                  |                            |                                      |                            |               |
| M1-Ras(dn)        | 101.3±6.2 vs. 91.9±4.3           | n=14; Z=-1.412; p=0.16     | 94.5±5.6 vs. 96.5±6.3                | n=14; Z=-0.345; p=0.73     | n=14          |
| LCK-Ras(dn)       | 95.0±2.6 vs. 98.9±3.1            | n=14; Z=0.910; p=0.36      | 99.3±3.5 vs. 94.7±2.8                | n=14; Z=-1.412; p=0.16     | n=14          |
| CD8-Rap2(dn)      | 90.5±6.1 vs. 189.2±8.9           | n=14; Z=3.296; p<0.005     | 89.8±5.1 vs. 97.9±3.7                | n=14; Z=1.162; p=0.65      | n=14          |
| LAMP1-Rap1(dn)    | 93.4±6.1 vs. 98.8±4.3            | n=20; Z=0.722; p=0.47      | 95.1±4.3 vs. 97.4±4.6                | n=14; Z=0.157; p=0.88      | n=14          |
| LTD               |                                  |                            |                                      |                            |               |
| M1-Ras(dn)        | 56.5±6.2 vs. 54.5±3.8            | n=16; Z=-0.103; p=0.92     | 96.0±3.5 vs. 98.7±3.4                | n=16; Z=1.193; p=0.23      | n=16          |
| LCK-Ras(dn)       | 57.7±6.6 vs. 54.7±4.9            | n=14; Z=-0.471; p=0.64     | 102.8±3.4 vs. 99.3±4.3               | n=14; Z=-0.659; p=0.51     | n=14          |
| CD8-Rap2(ca)      | 53.3±4.6 vs. 55.6±6.3            | n=15; Z=0.534; p=0.59      | 96.0±3.5 vs. 97.3±5.5                | n=15; Z=0.284; p=0.78      | n=15          |
| LAMP1-Rap1(ca)    | 65.2±3.1 vs. 96.4±3.5            | n=16; Z=3.561; p<0.001     | 98.1±3.4 vs. 97.5±2.1                | n=16; Z=0.052; p=0.96      | n=16          |

**Table S11**

Effects of target-delivered Ras(dn) and Rap(dn) expressed in CA1 neurons in intact brains (related to figure 8)

| Constructs      | AMPA currents<br>(Ctrl vs. Exp; pA) | Sample No.<br>Z & p values | NMDA currents<br>(Ctrl vs. Exp; pA) | Sample No.<br>Z & p values | Animal<br>No. |
|-----------------|-------------------------------------|----------------------------|-------------------------------------|----------------------------|---------------|
| Exp without TTX |                                     |                            |                                     |                            |               |
| M1-Ras(dn)      | 25.7±3.1 vs. 18.6±1.9               | n=18; Z=-2.853; p<0.005    | 38.3±3.6 vs. 35.2±2.7               | n=18; Z=-1.546; p=0.12     | n=9           |
| LCK-Ras(dn)     | 25.7±3.1 vs. 13.7±1.1               | n=18; Z=-3.114; p<0.005    | 38.3±3.6 vs. 34.4±2.7               | n=18; Z=-1.720; p=0.09     | n=9           |
| Exp with TTX    |                                     |                            |                                     |                            |               |
| M1-Ras(dn)      | 23.3±2.1 vs. 21.6±2.4               | n=21; Z=-1.269; p=0.20     | 36.8±2.6 vs. 35.3±2.4               | n=21; Z=-1.164; p=0.24     | n=11          |
| LCK-Ras(dn)     | 23.3±2.1 vs. 21.5±1.9               | n=21; Z=-1.616; p=0.11     | 36.8±2.6 vs. 35.7±2.2               | n=21; Z=-0.191; p=0.85     | n=11          |
| Exp without TTX |                                     |                            |                                     |                            |               |
| M1-Ras(ca)      | 23.1±2.1 vs. 28.6±2.6               | n=23; Z=2.768; p<0.01      | 35.7±2.8 vs. 37.1±3.1               | n=23; Z=1.632 p=0.10       | n=14          |
| LCK-Ras(ca)     | 23.1±2.1 vs. 27.8±2.1               | n=23; Z=3.407; p<0.005     | 35.7±2.8 vs. 37.0±2.7               | n=23; Z=1.400 p=0.16       | n=14          |
| Exp without TTX |                                     |                            |                                     |                            |               |
| CD8-Rap2(dn)    | 24.7±3.3 vs. 35.2±3.2               | n=16; Z=3.413; p<0.005     | 36.6±3.5 vs. 38.1±2.3               | n=16; Z=0.569; p=0.57      | n=8           |
| LAMP1-Rap1(dn)  | 24.7±3.3 vs. 32.2±3.3               | n=16; Z=2.585; p<0.05      | 36.6±3.5 vs. 37.3±2.3               | n=16; Z=0.052; p=0.96      | n=8           |
| Exp with TTX    |                                     |                            |                                     |                            |               |
| CD8-Rap2(dn)    | 23.3±2.2 vs. 23.6±2.0               | n=20; Z=-0.149; p=0.88     | 36.8±2.7 vs. 37.7±2.6               | n=20; Z=0.336; p=0.74      | n=10          |
| LAMP1-Rap1(dn)  | 23.3±2.2 vs. 22.0±2.2               | n=20; Z=-0.448; p=0.65     | 36.8±2.7 vs. 33.6±3.0               | n=20; Z=-1.120; p=0.26     | n=10          |
| Exp without TTX |                                     |                            |                                     |                            |               |
| CD8-Rap2(ca)    | 31.3±1.9 vs. 25.7±2.1               | n=21; Z=-2.485; p<0.05     | 43.4±2.3 vs. 41.6±3.1               | n=21; Z=-0.400; p=0.69     | n=12          |
| LAMP1-Rap1(ca)  | 31.3±1.9 vs. 25.3±2.2               | n=21; Z=-2.798; p<0.01     | 43.4±2.3 vs. 40.6±3.0               | n=20; Z=-0.539; p=0.59     | n=12          |
